# Supplementary material for: High-temperature phase transitions, switchable dielectric behaviors and barocaloric effects in three new organic molecule-based crystals
Source: Royal Society of Chemistry journal article supplement (doi:10.1039/c8nj03845g), 2018-11-12
Supplement: c8nj03845g1.pdf [file c8nj03845g1.pdf]

## Supporting information for:

### High-temperature phase transitions, switchable dielectric behaviors and barocaloric effects in three new organic molecule-based crystals

Rui-Xia Li, Lin Zhou, Ping-Ping Shi, Xuan Zheng, Ji-Xing Gao, Qiong Ye\* and Da-Wei Fu\*

*Ordered Matter Science Research Center, Jiangsu Key Laboratory for Science and Applications of Molecular Ferroelectrics, Southeast University, Nanjing 211189, People's Republic of China.*

*E-mail: yeqiong@seu.edu.cn, dawei@seu.edu.cn*

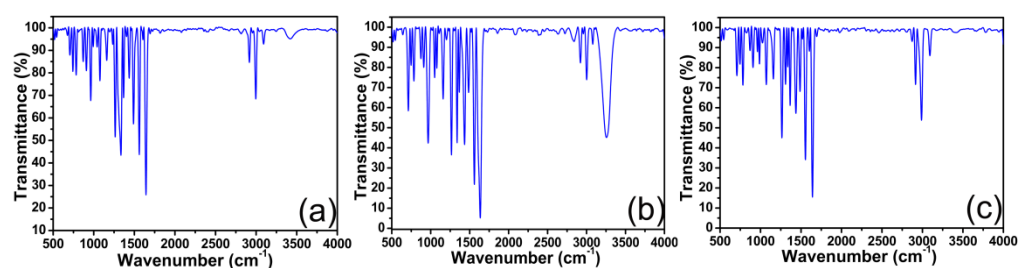

**Figure S1.** The IR spectrum of compounds **1** (a), **2** (b) and **3**(c).

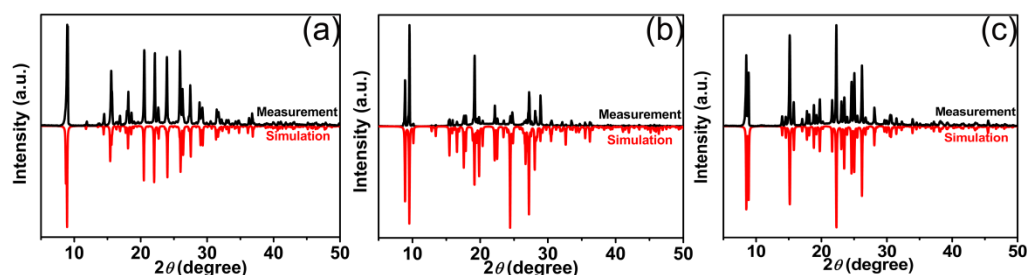

**Figure S2.** PXRD patterns of compounds **1** (a), **2** (b) and **3** (c) based on the measurement data (black line) at 298 K and the simulation data (red line) based on the crystal structures of **1** at 223 K, **2** at 298 K and **3** at 298 K, respectively.

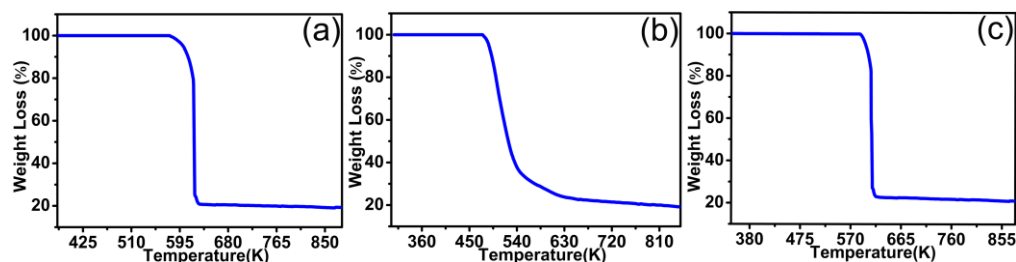

**Figure S3.** TGA curves of compound **1** (a), **2** (b) and **3** (c).

**Table S1.** Crystallographic data and structure refinements for compounds **1**, **2** and **3**.

| Compound                                                | <b>1</b>                                                           | <b>1</b>                                                           | <b>2</b>                                                           | <b>3</b>                                                           |
|---------------------------------------------------------|--------------------------------------------------------------------|--------------------------------------------------------------------|--------------------------------------------------------------------|--------------------------------------------------------------------|
| Chemical Formula                                        | C <sub>11</sub> H <sub>16</sub> N <sub>3</sub> O <sub>7</sub> P    | C <sub>11</sub> H <sub>16</sub> N <sub>3</sub> O <sub>7</sub> P    | C <sub>10</sub> H <sub>14</sub> N <sub>3</sub> O <sub>8</sub> P    | C <sub>14</sub> H <sub>20</sub> N <sub>3</sub> O <sub>7</sub> P    |
| Formula weight                                          | 333.24                                                             | 333.24                                                             | 335.21                                                             | 373.30                                                             |
| Temperature (K)                                         | 223                                                                | 333                                                                | 298                                                                | 298                                                                |
| Crystal system                                          | Monoclinic                                                         | Monoclinic                                                         | Triclinic                                                          | Monoclinic                                                         |
| Space group                                             | <i>P2<sub>1</sub>/n</i>                                            | <i>C2/c</i>                                                        | <i>P</i> $\bar{1}$                                                 | <i>P2<sub>1</sub>/n</i>                                            |
| <i>a</i> , Å                                            | 11.325(5)                                                          | 11.412(2)                                                          | 7.4008(15)                                                         | 12.300(3)                                                          |
| <i>b</i> , Å                                            | 19.765(9)                                                          | 19.766(4)                                                          | 10.413(2)                                                          | 19.943(4)                                                          |
| <i>c</i> , Å                                            | 6.921(3)                                                           | 7.048(3)                                                           | 10.972(2)                                                          | 7.3103(15)                                                         |
| $\alpha$ , deg                                          | 90                                                                 | 90                                                                 | 109.76(3)                                                          | 90                                                                 |
| $\beta$ , deg                                           | 100.830(8)                                                         | 113.10(4)                                                          | 99.84(3)                                                           | 98.55(3)                                                           |
| $\gamma$ , deg                                          | 90                                                                 | 90                                                                 | 104.20(3)                                                          | 90                                                                 |
| <i>V</i> , Å <sup>3</sup>                               | 1521.6(12)                                                         | 1462.4(9)                                                          | 741.0(4)                                                           | 1773.3(7)                                                          |
| <i>Z</i>                                                | 4                                                                  | 4                                                                  | 2                                                                  | 4                                                                  |
| Index ranges                                            | -14 ≤ <i>h</i> ≤ 14<br>-25 ≤ <i>k</i> ≤ 25<br>-8 ≤ <i>l</i> ≤ 8    | -13 ≤ <i>h</i> ≤ 13<br>-23 ≤ <i>k</i> ≤ 23<br>-8 ≤ <i>l</i> ≤ 8    | -8 ≤ <i>h</i> ≤ 6<br>-10 ≤ <i>k</i> ≤ 12<br>-13 ≤ <i>l</i> ≤ 13    | -14 ≤ <i>h</i> ≤ 14<br>-23 ≤ <i>k</i> ≤ 21<br>-8 ≤ <i>l</i> ≤ 8    |
| <i>D</i> <sub>calcd</sub> , g•cm <sup>-3</sup>          | 1.455                                                              | 1.514                                                              | 1.502                                                              | 1.398                                                              |
| $\mu$ , mm <sup>-1</sup>                                | 0.219                                                              | 0.228                                                              | 0.230                                                              | 0.196                                                              |
| refns measured                                          | 11026                                                              | 2380                                                               | 4251                                                               | 9960                                                               |
| independent reflns                                      | 3477                                                               | 1300                                                               | 2608                                                               | 3125                                                               |
| reflns used                                             | 2788                                                               | 700                                                                | 1797                                                               | 2239                                                               |
| Goodness-of-fit on <i>F</i> <sup>2</sup>                | 1.119                                                              | 1.099                                                              | 1.076                                                              | 1.051                                                              |
| Final <i>R</i> indices [ <i>I</i> > 2sigma( <i>I</i> )] | <i>R</i> <sub>1</sub> = 0.0645,<br><i>wR</i> <sub>2</sub> = 0.1681 | <i>R</i> <sub>1</sub> = 0.1055,<br><i>wR</i> <sub>2</sub> = 0.2832 | <i>R</i> <sub>1</sub> = 0.0851,<br><i>wR</i> <sub>2</sub> = 0.2314 | <i>R</i> <sub>1</sub> = 0.0775,<br><i>wR</i> <sub>2</sub> = 0.2229 |

**Table S2.** Bond lengths (Å) and bond angles (°) of cations in compound **1** at 223 K, compounds **2** and **3** at 298 K.

| Bond lengths(Å) | <b>1</b> | <b>2</b> | <b>3</b> | Bond angles(°) | <b>1</b>   | <b>2</b> | <b>3</b> |
|-----------------|----------|----------|----------|----------------|------------|----------|----------|
| C7-P1           | 1.785(3) | 1.778(6) | 1.776(5) | C7-P1-C8       | 109.29(18) | 109.2(3) | 108.7(3) |

|         |          |          |          |             |            |          |            |
|---------|----------|----------|----------|-------------|------------|----------|------------|
| C8-P1   | 1.782(4) | 1.782(5) | 1.778(5) | C7-P1-C9    | 109.80(18) | 111.0(3) | 110.1(2)   |
| C9-P1   | 1.778(3) | 1.786(5) | 1.771(5) | C8-P1-C9    | 109.74(18) | 110.2(3) | 108.4(3)   |
| C10-P1  | 1.800(3) | 1.811(5) | 1.788(4) | C7-P1-C10   | 109.33(16) | 110.8(3) | 112.4(2)   |
| C10-C11 | 1.545(5) |          | 1.527(6) | C8-P1-C10   | 109.30(16) | 108.1(3) | 109.0(2)   |
| C10-C14 |          |          | 1.524(4) | C9-P1-C10   | 109.36(16) | 107.6(3) | 108.16(19) |
| C10-O8  |          | 1.403(6) |          | C11-C10-P1  | 113.7(2)   |          | 113.9(3)   |
| C11-C12 |          |          | 1.484(7) | O8-C10-P1   |            | 110.6(4) |            |
| C12-C13 |          |          | 1.400(9) | C14-C10-P1  |            |          | 115.5(3)   |
| C13-C14 |          |          | 1.473(8) | C10-C11-C12 |            |          | 105.0(4)   |
|         |          |          |          | C11-C12-C13 |            |          | 108.9(5)   |
|         |          |          |          | C12-C13-C14 |            |          | 110.6(5)   |
|         |          |          |          | C13-C14-C10 |            |          | 103.5(4)   |
|         |          |          |          | C14-C10-C11 |            |          | 104.2(4)   |

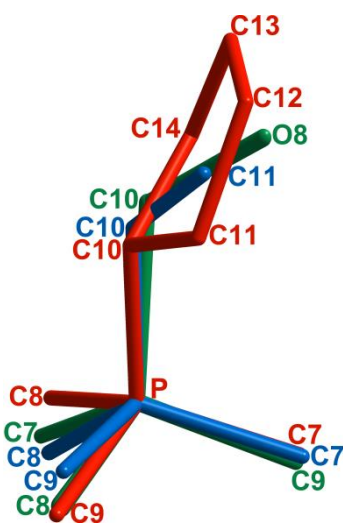

**Figure S4.** The overlapped view of cations in compounds **1**, **2** and **3**. The hydrogen atoms are omitted for clarity.

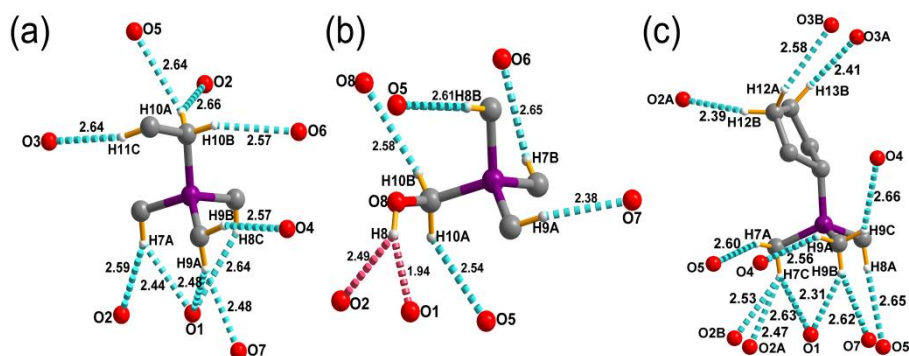

**Figure S5.** For compounds **1** (a), **2** (b) and **3** (c), the hydrogen bonds surrounding the cations are shown with dashed lines and the distances are indicated in Å. Other atoms which are not involved in the hydrogen-bonding interactions are omitted for clarity.

**Table S3.** Parameters of hydrogen bonds in compounds **1**, **2** and **3**.

| Compound              | D-H...A                 | H...A(Å)            | D...A(Å)  | D-H...A(°) |
|-----------------------|-------------------------|---------------------|-----------|------------|
| <b>1</b>              | C(7)-H(7A)...O(1)#1     | 2.44                | 3.226(4)  | 139.0      |
|                       | C(7)-H(7A)...O(2)#1     | 2.59                | 3.485(5)  | 155.3      |
|                       | C(8)-H(8C)...O(1)#1     | 2.64                | 3.383(4)  | 134.6      |
|                       | C(9)-H(9A)...O(1)#1     | 2.48                | 3.250(4)  | 136.8      |
|                       | C(9)-H(9A)...O(7)#1     | 2.48                | 3.387(4)  | 156.6      |
|                       | C(9)-H(9B)...O(4)#2     | 2.57                | 3.477(5)  | 158.3      |
|                       | C(10)-H(10A)...O(2)#3   | 2.66                | 3.512(4)  | 147.4      |
|                       | C(10)-H(10A)...O(5)     | 2.64                | 3.354(4)  | 130.4      |
|                       | C(10)-H(10B)...O(6)#4   | 2.57                | 3.442(4)  | 149.5      |
|                       | C(11)-H(11C)...O(3)#5   | 2.64                | 3.569(5)  | 164.0      |
|                       | <b>2</b>                | C(7)-H(7B)...O(6)#6 | 2.64      | 3.515(8)   |
| C(8)-H(8B)...O(5)     |                         | 2.61                | 3.565(8)  | 174.3      |
| C(9)-H(9A)...O(7)#7   |                         | 2.39                | 3.278(8)  | 153.6      |
| C(10)-H(10A)...O(5)#8 |                         | 2.54                | 3.395(7)  | 146.8      |
| C(10)-H(10B)...O(8)#6 |                         | 2.59                | 3.322 (6) | 132.7      |
| O(8)-H(8)...O(1)#9    |                         | 1.94                | 2.728(5)  | 161.2      |
| O(8)-H(8)...O(2)#9    |                         | 2.49                | 2.969(8)  | 118.1      |
| <b>3</b>              | C(7)-H(7A)...O(5) #10   | 2.60                | 3.501(7)  | 156.4      |
|                       | C(7)-H(7C)...O(1)#11    | 2.63                | 3.330(6)  | 130.0      |
|                       | C(7)-H(7C)...O(2A)#11   | 2.47                | 3.32(2)   | 148.2      |
|                       | C(7)-H(7C)...O(2B)#11   | 2.53                | 3.233(2)  | 130.5      |
|                       | C(8)-H(8A)...O(5)#12    | 2.65                | 3.581(6)  | 163.7      |
|                       | C(9)-H(9A)...O(4)#10    | 2.56                | 3.415(6)  | 147.8      |
|                       | C(9)-H(9B)...O(1)#11    | 2.31                | 3.142(5)  | 144.1      |
|                       | C(9)-H(9B)...O(7)#11    | 2.62                | 3.465(7)  | 146.5      |
|                       | C(9)-H(9C)...O(4)       | 2.66                | 3.352(5)  | 129.8      |
|                       | C(12)-H(12A)...O(3B)    | 2.58                | 3.443(1)  | 148.4      |
|                       | C(12)-H(12B)...O(2A)#13 | 2.39                | 3.248(2)  | 148.0      |
|                       | C(13)-H(13B)...O(3A)    | 2.41                | 3.303(2)  | 153.4      |

Symmetry code: #1 -x+1/2, y-1/2, -z+1/2. #2 -x+3/2, y-1/2, -z+1/2. #3 -x+1, -y+1, -z+1. #4 x+1/2, -y+1/2, z+1/2. #5 -x+1, -y+1, -z. #6 -x+1, -y, -z+1. #7 x, y+1, z. #8 x-1, y, z. #9 -x+1, -y, -z+2. #10 -x+1, -y, -z+1. #11 x-1, y, z. #12 -x+1, -y, -z+2. #13 x-1/2, 1/2-y, z-1/2.

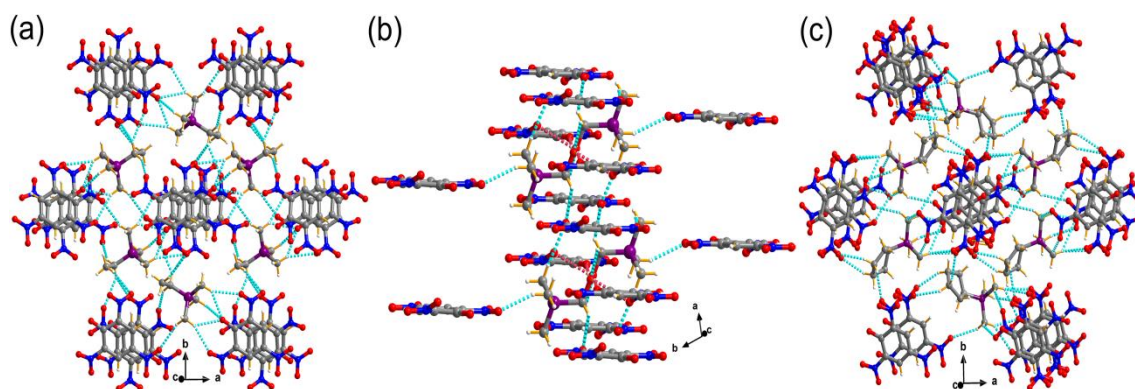

**Figure S6.** Packing diagrams of **1** (a), **2** (b), and **3** (c) viewed down the c axis, with the hydrogen bonds shown as dashed lines.

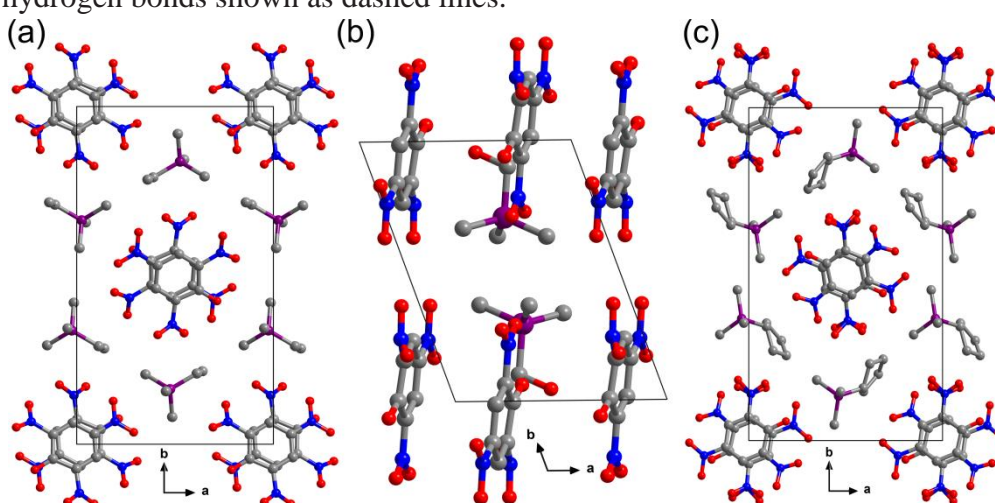

**Figure S7.** The packing structures of compounds **1**(a), **2**(b) and **3**(c).

**Table S4.** Equivalent isotropic displacement parameters ( $U_{iso}$ ) for compound **1** at 223 K and 333 K.

| 1 (223 K) |                                     | 1 (333 K) |                                     |
|-----------|-------------------------------------|-----------|-------------------------------------|
| Atom      | $U_{iso}(\text{\AA}^2 \times 10^3)$ | Atom      | $U_{iso}(\text{\AA}^2 \times 10^3)$ |
| C(1)      | 27(1)                               | C(1)      | 214(4)                              |
| C(2)      | 26(1)                               | C(2)      | 203(3)                              |
| C(3)      | 29(1)                               | C(3)      | 229(4)                              |
| C(4)      | 27(1)                               | C(4)      | 230(5)                              |
| C(5)      | 28(1)                               | C(5)      | 252(5)                              |
| C(6)      | 28(1)                               | C(6)      | 415(8)                              |
| C(7)      | 46(1)                               | C(7)      | 217(4)                              |
| C(8)      | 44(1)                               | C(8)      | 299(4)                              |
| C(9)      | 46(1)                               | C(9)      | 357(8)                              |
| C(10)     | 34(1)                               | N(1)      | 272(4)                              |

|       |       |      |         |
|-------|-------|------|---------|
| C(11) | 43(1) | N(2) | 262(6)  |
| N(1)  | 34(1) | O(1) | 534(13) |
| N(2)  | 36(1) | O(2) | 414(6)  |
| N(3)  | 38(1) | O(3) | 451(6)  |
| O(1)  | 39(1) | O(4) | 363(6)  |
| O(2)  | 54(1) | P(1) | 224(2)  |
| O(3)  | 63(1) |      |         |
| O(4)  | 52(1) |      |         |
| O(5)  | 49(1) |      |         |
| O(6)  | 69(1) |      |         |
| O(7)  | 61(1) |      |         |
| P(1)  | 28(1) |      |         |

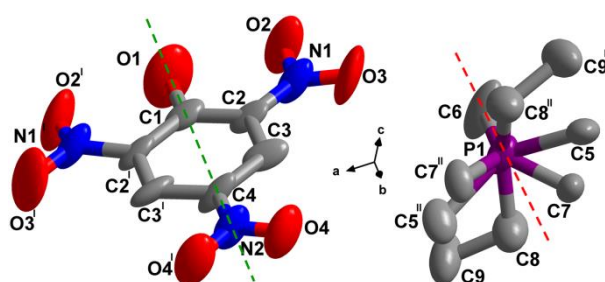

**Figure S8.** Molecular structures of **1** (a) at 333 K, thermal ellipsoids for all atoms are shown at the 10% probability level. Hydrogen atoms were omitted for clarity. Symmetry codes: (I)  $(-x, y, -2.5-z)$ ; (II)  $(-1-x, y, -2.5-z)$ .

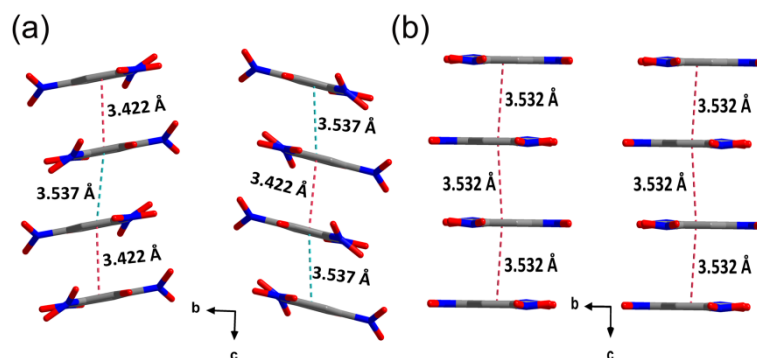

**Figure S9.** The diagrams of picrate anions in compounds **1**(a) at 223 K, **1**(b) at 333 K.

**Table S5.** The high-temperature cell parameters of compounds **2** and **3**.

|                    | <b>2</b> | <b>3</b> |
|--------------------|----------|----------|
| $a(\text{Å})$      | 11.20893 | 20.94900 |
| $b(\text{Å})$      | 9.86901  | 11.93100 |
| $c(\text{Å})$      | 6.80324  | 7.38200  |
| $\alpha(^{\circ})$ | 90.0     | 90.0     |
| $\beta(^{\circ})$  | 92.6     | 100.1    |
| $\gamma(^{\circ})$ | 90.0     | 90.0     |

|                   |        |         |
|-------------------|--------|---------|
| $V(\text{\AA}^3)$ | 751.82 | 1816.47 |
|-------------------|--------|---------|

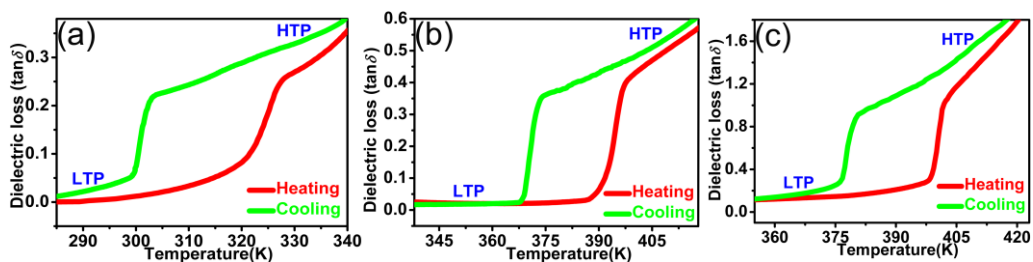

**Figure S10.** Temperature-variable dielectric loss ( $\tan\delta$ ) measured at 1 MHz of compounds **1** (a), **2** (b) and **3** (c).

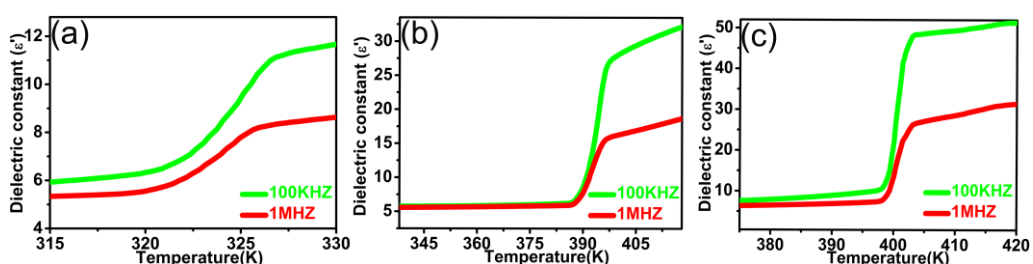

**Figure S11.** The dielectric constant ( $\epsilon'$ ) for compounds **1**(a), **2**(b) and **3**(c) measured in the heating modes at 100 kHz and 1 MHz.

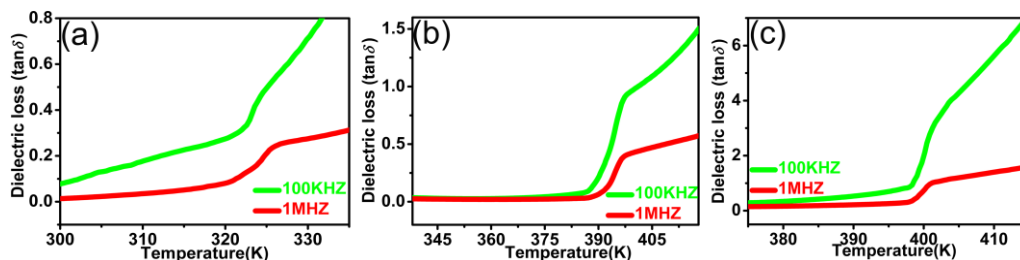

**Figure S12.** The dielectric loss ( $\tan\delta$ ) for compounds **1**(a), **2**(b) and **3**(c) measured in the heating modes at 100 kHz and 1 MHz.

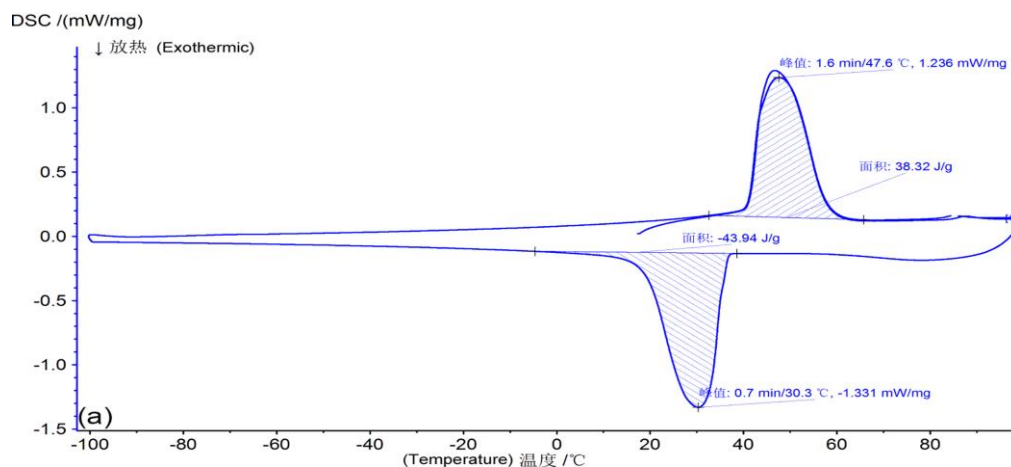

**Figure S13.** The original measured DSC image of compound **1**.

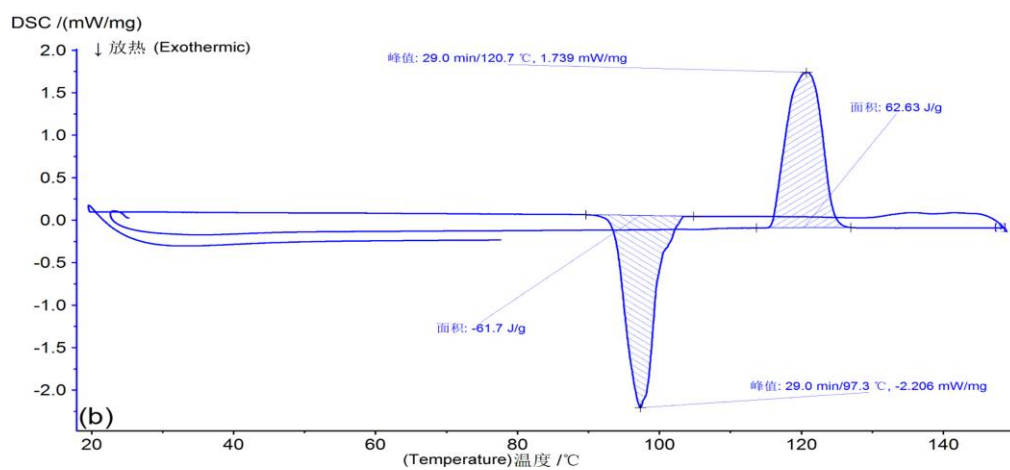

**Figure S14.** The original measured DSC image of compound 2.

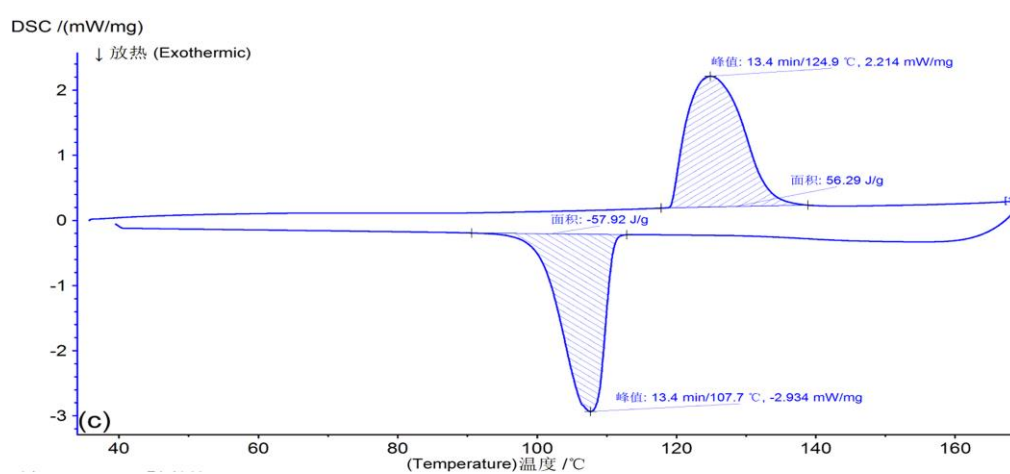

**Figure S15.** The original measured DSC image of compound 3.
